# Supplementary material for: The circular RNA NT5E promotes non-small cell lung cancer cell growth via sponging microRNA-134
Source: publisher site journal article supplement (doi:10.18632/aging.102861), 2020-02-25
Supplement: Supplementary file [file aging-v12i4-102861-supplementary-material-SD1.pdf]

## SUPPLEMENTARY MATERIALS

### Supplementary Figure

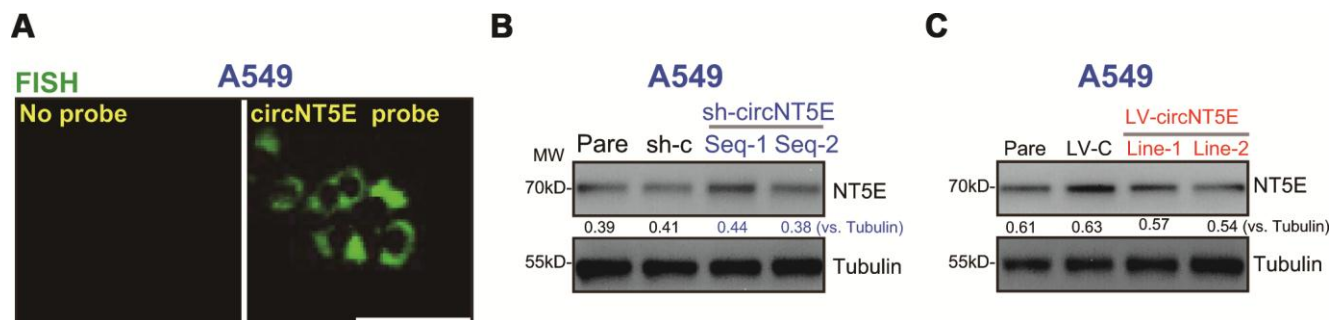

**Supplementary Figure 1. FISH showed the localization of circNT5E in A549 cells. (A).** Expression of NT5E and Tubulin (the loading control) in stable A549 cells with circNT5E shRNA (“sh-circNT5E-Seq-1/2”), the non-sense control shRNA (“sh-c”), lentiviral circNT5E expression construct (“LV-circNT5E-Line-1/2”) or the empty vector (“LV-C”), was shown (**B** and **C**, results were quantified). Bar= 50  $\mu$ m (**A**).
